# Supplementary material
Source: Research Square preprint supplement (doi:10.21203/rs.3.rs-8905143/v1)
Supplement: Supplementary file 1 [file 8b6ccf8d08c6540e414440f0.pdf]

## **Supplementary Item S1. Full details of the other members of the PREPARES Study Group**

The PREPARES Study stands for **PREference for PATient RENal replacement therapy and Sharing Study**.

Shigeyuki Arai, MD, PhD<sup>1</sup>; Tsuyoshi Watanabe, MD, PhD<sup>2</sup>; Keita Iwasaki, MD<sup>2</sup>; Yuuki Itou, MD<sup>2</sup>; Fumika Nagase, MD<sup>2</sup>; Kenta Torigoe, MD, PhD<sup>3</sup>; Shinichi Abe, MD, PhD<sup>3</sup>; Kumiko Muta, MD, PhD<sup>3</sup>; Tomomi Endo, MD, PhD<sup>4</sup>; Keita Mori, MD, PhD<sup>4</sup>; Michiya Shinozaki, MD, PhD<sup>5</sup>; Megumi Oikawa, MD, PhD<sup>6</sup>; Tsuyoshi Ohshiro, MD<sup>6</sup>; Yoshitaka Ishibashi, MD, PhD<sup>7</sup>; Ryo Sugiyama, MD<sup>8</sup>;

<sup>1</sup>Division of Nephrology, Department of Internal Medicine, Teikyo University School of Medicine, Itabashi-Ku, Tokyo, Japan

<sup>2</sup>Department of Rheumatology and Nephrology, Chubu Rosai Hospital, Nagoya, Aichi, Japan

<sup>3</sup>Department of Nephrology, Nagasaki University Hospital, Nagasaki, Nagasaki, Japan

<sup>4</sup>Medical Research Institute Kitano Hospital, PIIF Tazuke-Kofukai, Osaka, Osaka, Japan

<sup>5</sup>Department of Nephrology, Shin-Yurigaoka General Hospital, Kawasaki, Kanagawa, Japan

<sup>6</sup>Division of Nephrology, Department of Internal Medicine, Showa University Fujigaoka Hospital, Yokohama, Kanagawa, Japan

<sup>7</sup>Department of Nephrology, Japanese Red Cross Medical Center, Shibuya-ku, Tokyo, Japan

<sup>8</sup>Department of internal medicine, Okinawa prefectural Yaeyama Hospital, Ishigaki, Okinawa, Japan

**Supplementary Item S2. Questionnaire items regarding the choice of renal replacement therapy**

1. Who was your key person (a close individual with whom you consulted when choosing your renal replacement therapy)? Please check all that apply.

1. Spouse (husband/wife)
2. Biological mother
3. Biological father
4. Mother-in-law
5. Father-in-law
6. Daughter
7. Son-in-law
8. Son
9. Daughter-in-law
10. Sibling
11. Grandchild
12. Other (Please specify: \_\_\_\_\_ . Do they live with you? Yes / No)

2. Among the above, who was the key person you relied on the most?

Please choose one number between 1 and 12, and write it below:

( \_\_\_\_\_ )

3. How long has it been since you began seeing your current primary kidney doctor?

(Please only select one option.)

- a. Less than 6 months
- b. 6 months to less than 1 year
- c. 1 year to less than 3 years
- d. 3 years to less than 5 years
- e. 5 years to less than 10 years
- f. 10 years or more

### **Supplementary Item S3. Questionnaire items for individuals who ultimately chose a renal replacement therapy**

Who ultimately made the final decision regarding your renal replacement therapy?  
(Please only select one option.)

1. I made the decision myself.
2. The key person (e.g., a family member or close individual) made the decision.
3. My physician made the decision.
4. The key person (e.g., a family member or close individual) and I made the decision.  
[Proceed to Question A]
5. My physician and I made the decision. [Proceed to Question B]
6. The key person (e.g., a family member or close individual) and my physician made the decision. [Proceed to Question C]
7. The key person (e.g., a family member or close individual), my physician, and I made the decision. [Proceed to Question D]

Question A: For those who selected 4 above (i.e., the key person and I made the decision)

Please select the option that best describes each person's role in the decision-making process (Select only one option.)

1. I made the decision after considering the key person's opinion.
2. The key person made the decision after considering my opinion.
3. The key person and I made the decision together.

Question B: For those who selected 5 above (My physician and I made the decision)

Please select the option that best describes each person's role in the decision-making process (Select only one option.)

1. I made the decision after considering my physician's opinion.
2. My physician made the decision after considering my opinion.
3. My physician and I made the decision together.

Question C: For those who selected 6 above (The key person and my physician made the decision)

Please select the option that best describes each person's role in the decision-making process (Select only one.)

1. The key person made the decision after considering my physician's opinion.
2. My physician made the decision after considering the key person's opinion.
3. The key person and my physician made the decision together.

Question D: For those who selected 7 above (The key person, my physician, and I made the decision)

Please select the option that best describes each person's role in the decision-making process (Select only one.)

1. I made the decision after considering the key person's and my physician's opinions.
2. The key person made the decision after considering my opinion and my physician's opinion.
3. My physician made the decision after considering my opinion and the key person's opinion.
4. The key person, my physician, and I made the decision together.

#### Supplementary Item S4. Japanese version of 10 point collaboRATE scale<sup>1</sup>

|                                      |                                                                                                                                                                                 |
|--------------------------------------|---------------------------------------------------------------------------------------------------------------------------------------------------------------------------------|
| Instruction                          | あなたがさきほど受けられた診療についておうかがいします。 <sup>a</sup><br>(Original: “Thinking about the appointment you have just had ...”)                                                                 |
| Question 1                           | あなたが自分の健康に関する問題を理解できるように、医師はどのくらい努力したと思いますか？<br>(Original: “How much effort was made to help you understand your health issues?”)                                               |
| Question 2                           | あなたの健康の問題を考える際に、あなたにとって最も大切なことは何かを聞くために、医師はどのくらい努力したと思いますか？<br>(Original: “How much effort was made to listen to the things that matter most to you about your health issues?”) |
| Question 3                           | 治療方針を決定するにあたり、あなたにとって最も大切なことが反映されるように、医師はどのくらい努力したと思いますか？<br>(Original: “How much effort was made to include what matters most to you in choosing what to do next?”)            |
| Response options for Question 1 to 3 | 0 1 2 3 4 5 6 7 8 9                                                                                                                                                             |

The original English version<sup>2</sup> is also provided for each item and response.

<sup>a</sup>In this study, the additional statement below was presented before the instructional statement in Japanese:

“[前の質問]で担当医と話し合ったこと(下では「さきほど受けられた診療」と書かれています)についてお尋ねします。次の質問について、もっともよく当てはまる数字に○をしてください。” (English translation: Regarding [the previous question], we are interested in your discussion with your doctor (referred to below as “the appointment you have just had”). Please circle the number that best applies for the following questions.)

In the previous question, we queried the topics discussed between the patient and their kidney doctor regarding the choice of renal replacement therapy. A list of these topics and the frequency with which patients selected them is described in our previous study.<sup>3</sup>

## **Supplementary Item S5. Categories of decision-making roles in renal replacement therapy**

These categories were determined based on questions and response options used in a previous study among patients with heart failure.<sup>4</sup>

(1) No patient involvement (i.e., the key person and/or physician made the decision)

Patients who selected one of the following responses in the first question in Supplementary Item S2:

- "2. The key person (e.g., a family member or close individual) made the decision."
- "3. My physician made the decision."
- "6. The key person (e.g., a family member or close individual) and my physician made the decision."

(2) Key person-led (i.e., the key person made the decision after considering the patient's opinion)

Patients who selected one of the following responses:

- Question A: "2. The key person made the decision after considering my opinion."
- Question D: "2. The key person made the decision after considering my opinion and my physician's opinion."

(3) Physician-led (i.e., the physician made the decision after considering the patient's opinion)

Patients who selected one of the following responses:

- Question B: "2. My physician made the decision after considering my opinion."
- Question D: "3. My physician made the decision after considering my opinion and the key person's opinion."

(4) Patient alone (i.e., the patient made the decision independently)

Patients who selected the following response in the first question in Supplementary Item S2:

- "1. I made the decision myself."

(5) Patient-led (i.e., the patient made the decision after considering the key person's and/or physician's opinion)

Patients who selected one of the following responses:

- Question A: "1. I made the decision after considering the key person's opinion."

- Question B: "1. I made the decision after considering my physician's opinion."
- Question D: "1. I made the decision after considering the key person's and my physician's opinions."

(6) Collaborative decision-making (i.e., the patient made the decision together with the key person and/or physician)

Patients who selected one of the following responses:

- Question A: "3. The key person and I made the decision together."
- Question B: "3. My physician and I made the decision together."
- Question D: "4. The key person, my physician, and I made the decision together."

## Reference

1. Nishijima T. collaboRATE for patients - Japanese. Accessed December 25, 2025. <https://www.glynelwyn.com/collaborate-measure.html>
2. Elwyn G, Barr PJ, Grande SW, et al. Developing CollaboRATE: a fast and frugal patient-reported measure of shared decision making in clinical encounters. *Patient Educ Couns.* 2013;93:102–107.
3. Shibagaki Y, Sofue T, Kawarazaki H, Toida T, Suzuki T, Nishiwaki H, et al. Shared decision-making in renal replacement therapy selection: Patient perceptions, preferences, and influencing factors in a nationwide cross-sectional study in Japan. *Kidney Int Rep.* 2025;10:2778–2788.
4. Ozdemir S, Teo I, Bundoc FG, Malhotra C, Yeo KK, David Sim KL, et al. Role in decision making among congestive heart failure patients and its association with patient outcomes: a baseline analysis of the SCOPAH study. *Patient Educ Couns.* 2021;104: 496–504.
